# Supplementary material for: Estramustine Phosphate Inhibits TGF-β-Induced Mouse Macrophage Migration and Urokinase-Type Plasminogen Activator Production
Source: Hindawi journal article supplement (doi:10.1155/2018/3134102), 2018-09-02
Supplement: f1 [file 3134102.f1.pdf]

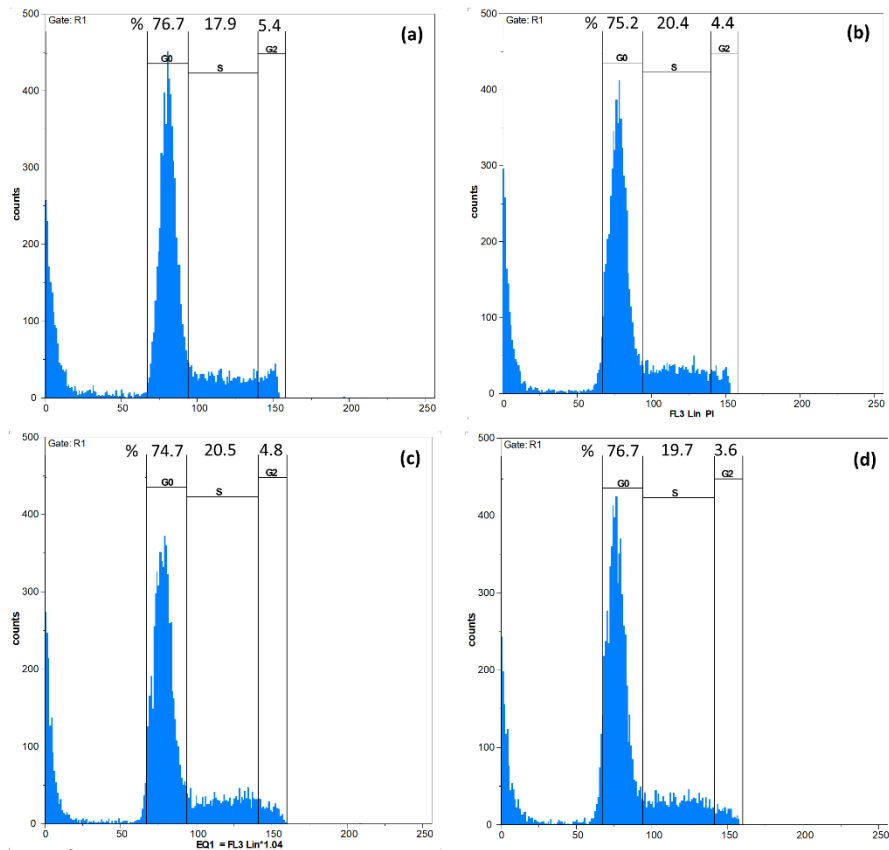

### Supplementary Figure.

RAW cells were 24 hour treated with TGF- $\beta$  5 ng/ml with or without EP 10  $\mu$ M. Then, cells were subjected to flow cytometer cell cycle analysis. Briefly, treated cells were 3X PBS washed and fixed with 70% cold ethanol. Then, cells were treated with RNase A (10  $\mu$ M/ml)/PBS for 30 minutes and stained with Propidium Iodide (5  $\mu$ g/ml). Figure shows that cell treatments did not modify the cell frequency (%) in the different cell cycle phases.
